# Supplementary material
Source: Springer Nature journal article supplement (https://www.springermedizin.de/resource/supplementary/12885_2012_3213_MOESM2_ESM.pdf/9463198)
Supplement: MOESM2 [file 9463198]

| <b>Additional file 2.</b>                                                                                                      |                         |                           |     |
|--------------------------------------------------------------------------------------------------------------------------------|-------------------------|---------------------------|-----|
| Correlation between the amount of tumor stroma content and the density of CD163 <sup>+</sup> and CD68 <sup>+</sup> TAMs in TS. |                         |                           |     |
| Clinicopathologic features                                                                                                     | Tumor stroma content    |                           |     |
|                                                                                                                                | Correlation coefficient | <i>P</i> value (2-tailed) | N   |
| CD163 in TS                                                                                                                    | -0,300**                | .001                      | 112 |
| CD68 in TS                                                                                                                     | -0,145**                | .000                      | 102 |
